# Supplementary material
Source: MDPI journal article supplement (https://www.mdpi.com/2072-4292/12/3/397)

*Supplementary*

## **Assessment of UAV-Onboard Multispectral Sensor for Non-Destructive Site-Specific Rapeseed Crop Phenotype Variable at Different Phenological Stages and Resolutions**

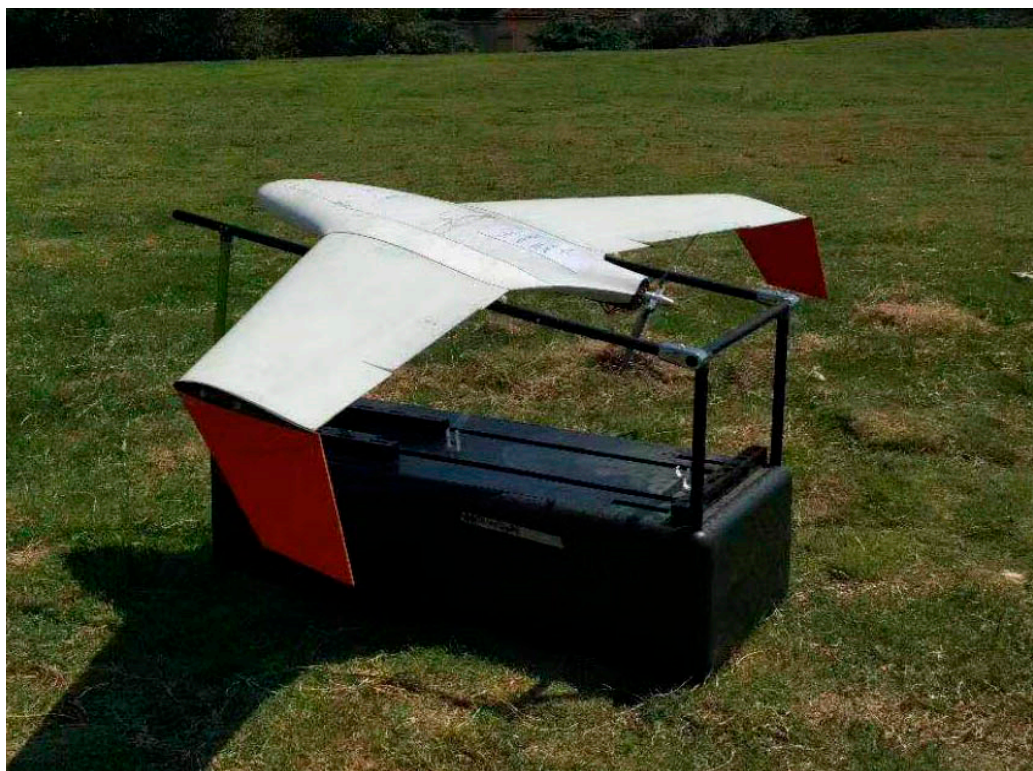

**Figure S1.** The UAV used for image acquisition.

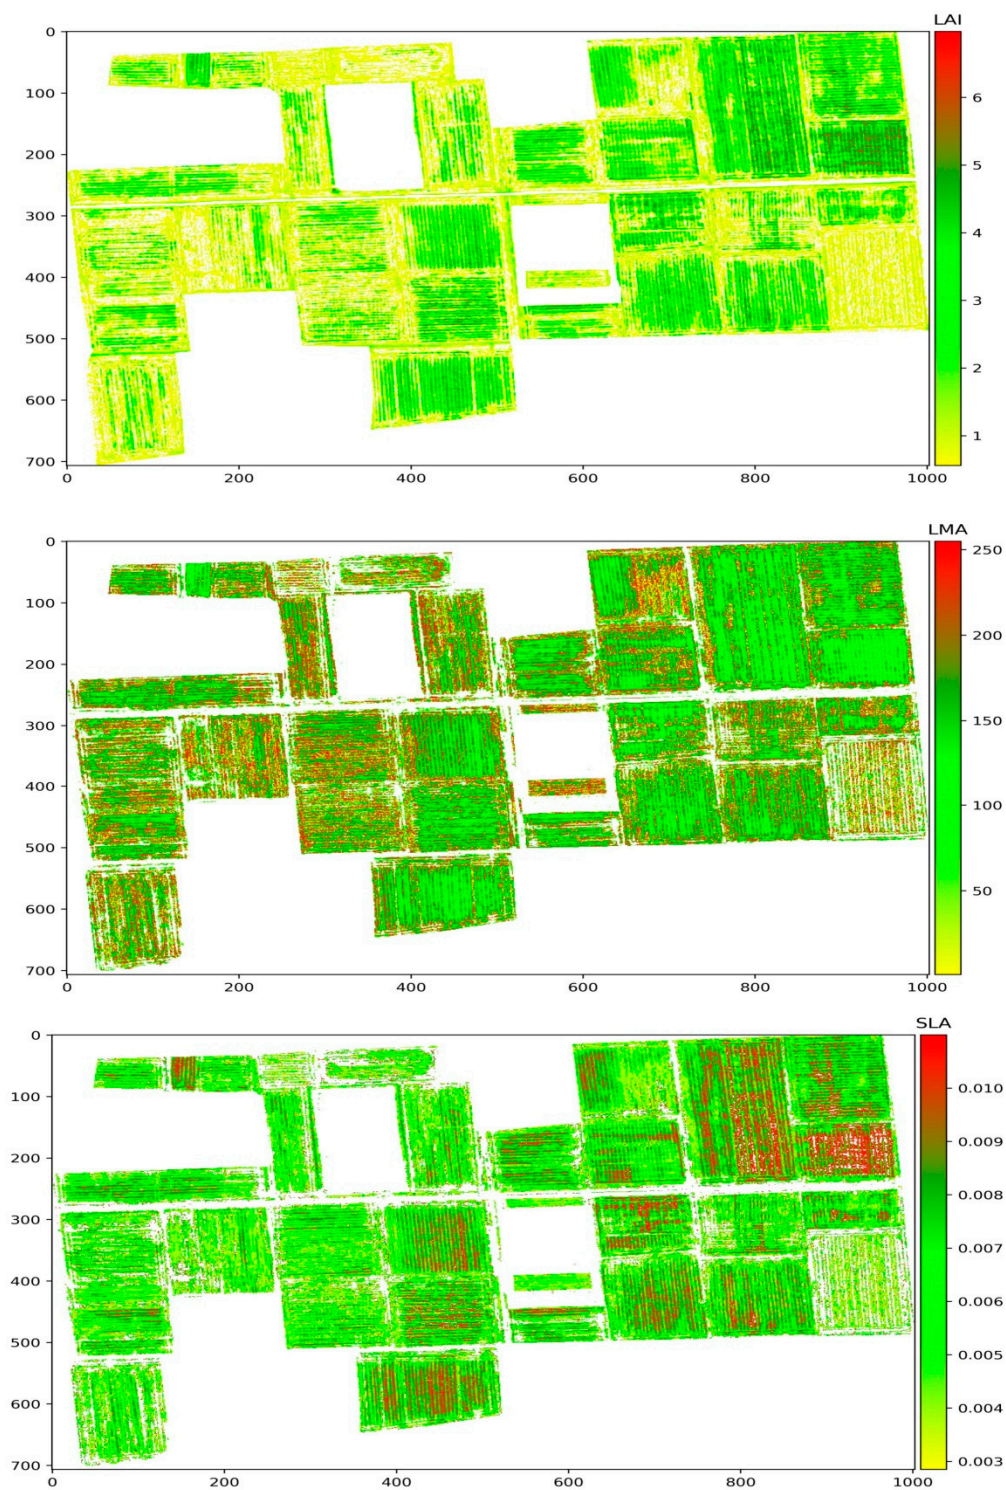

Figure S2. Map of LAI, LMA and SLA at seedling stage.



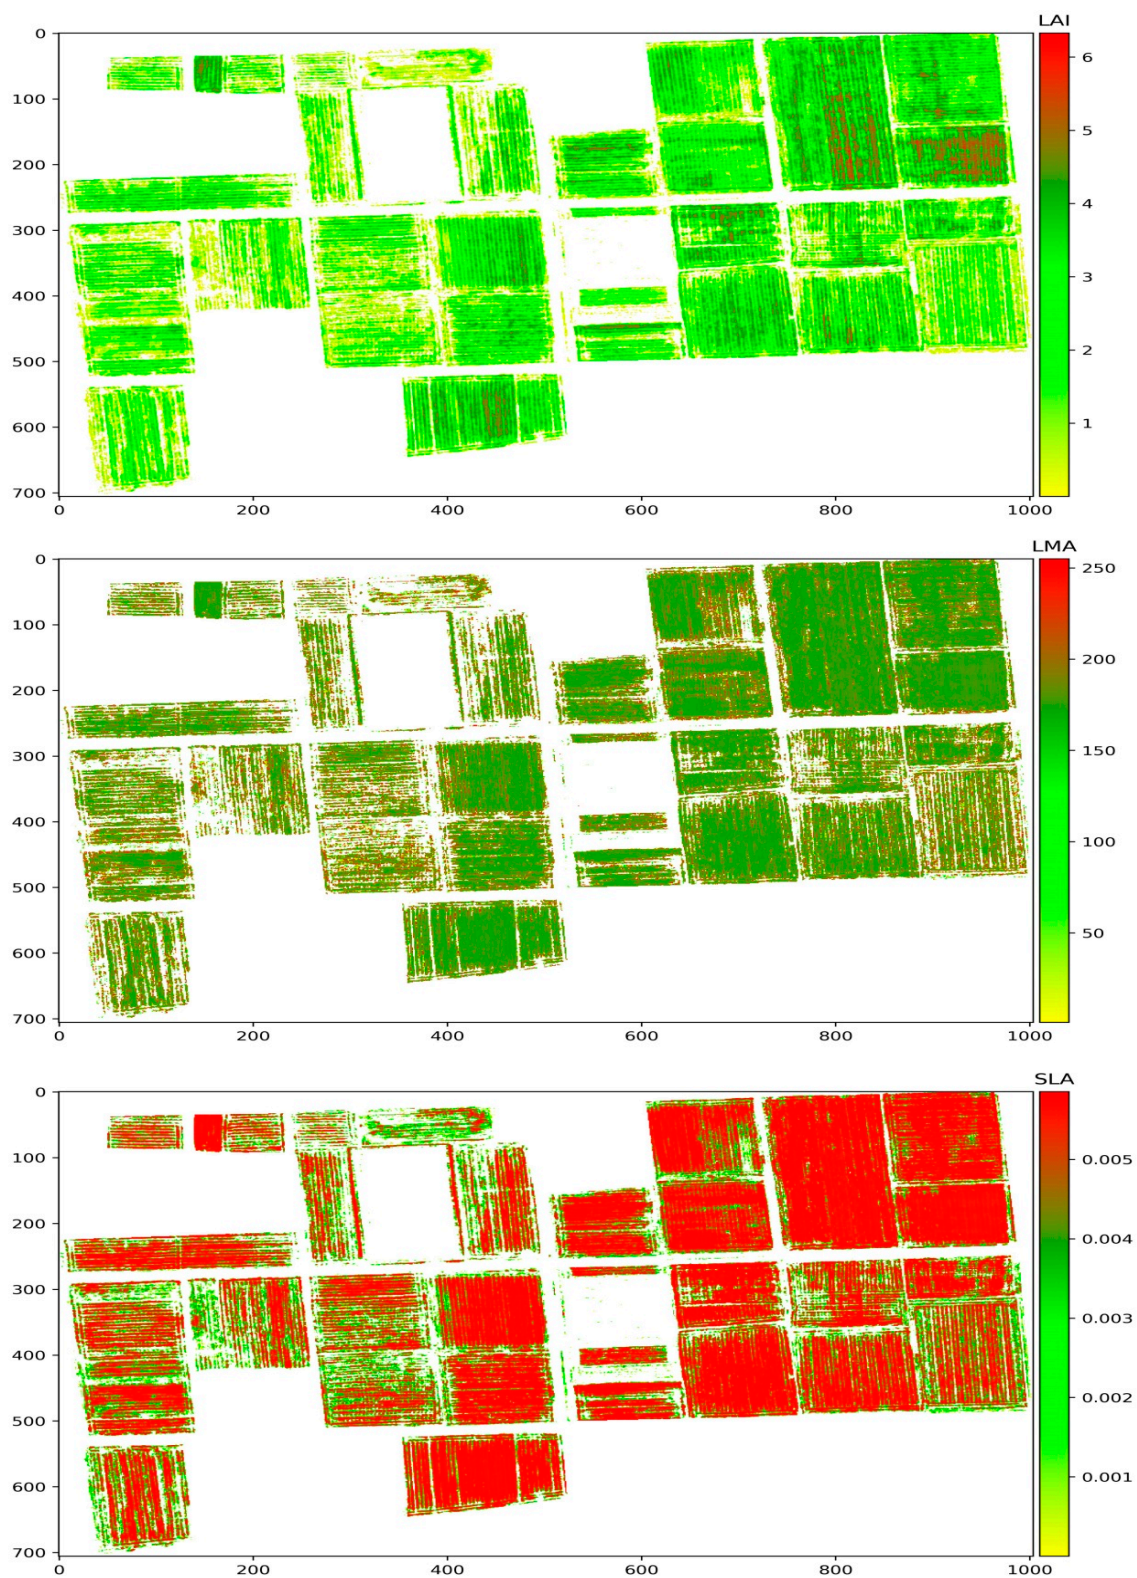

Figure S3. Map of LAI, LMA and SLA at elongation stage.

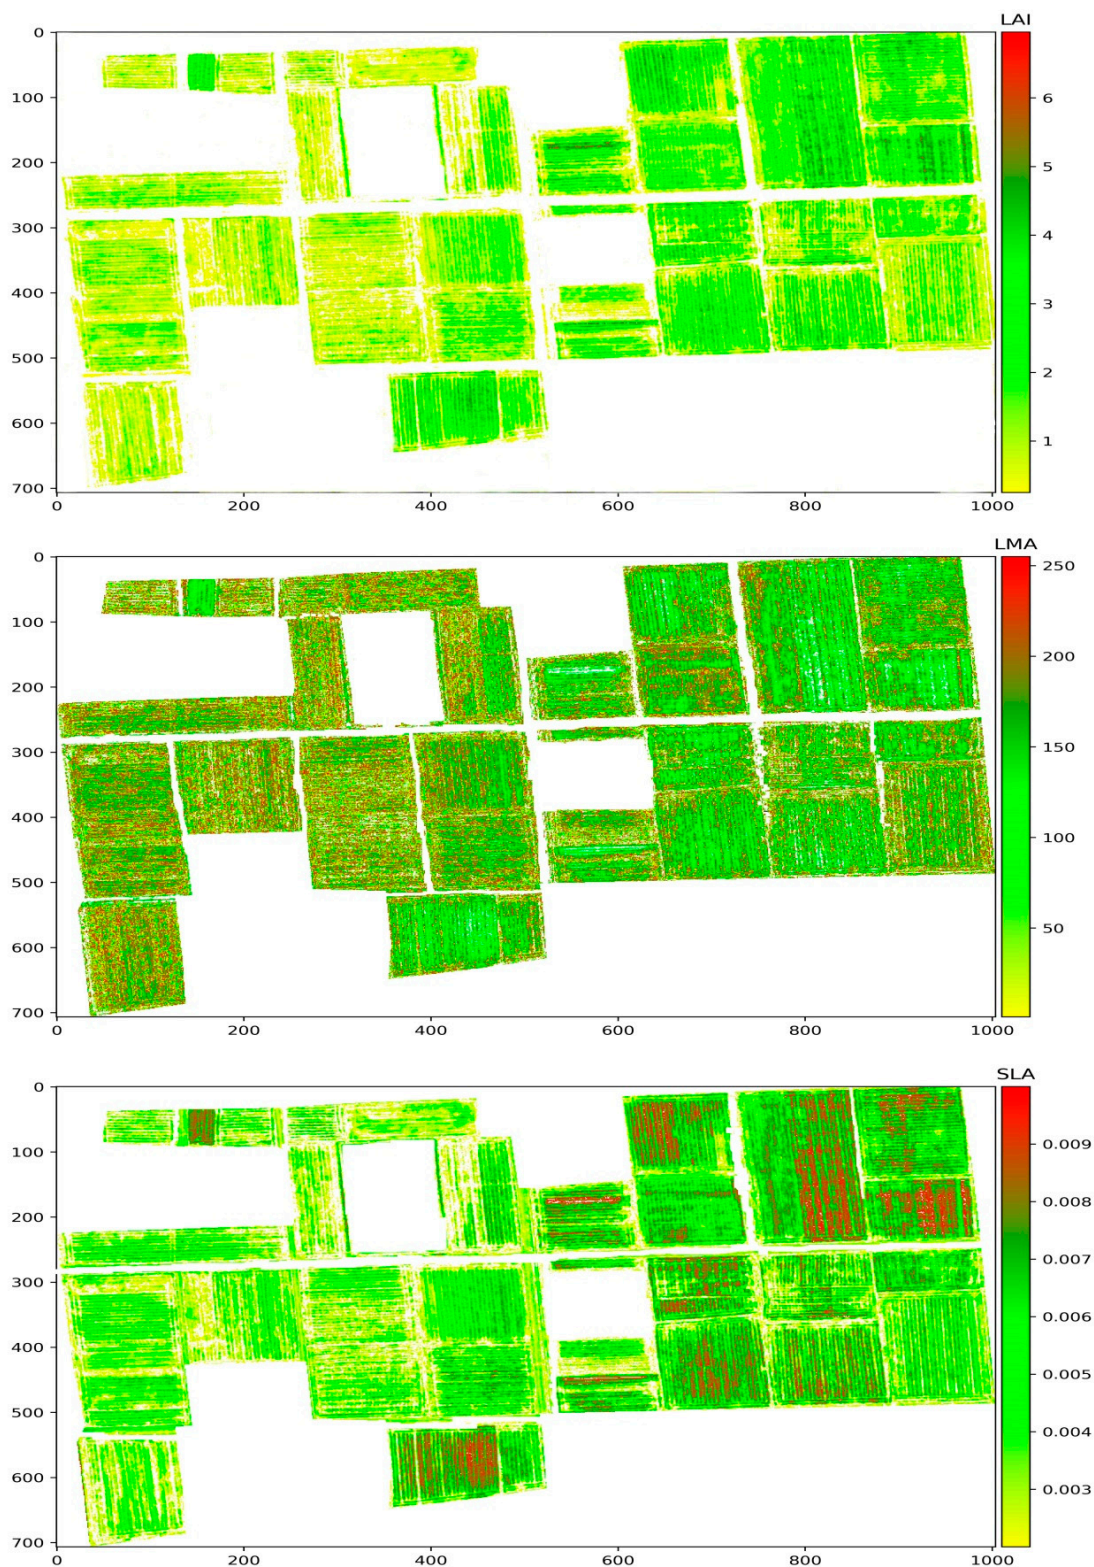

Figure S4. Map of LAI, LMA and SLA at flowering stage.

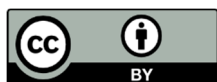

Supplement: s1 [file s1]
